# Supplementary material for: Selectively actuated multi-shape memory effect of a polymer multicomposite
Source: Royal Society of Chemistry journal article supplement (doi:10.1039/c5ta08513f), 2015-01-01
Supplement: c5ta08513f4.pdf [file c5ta08513f4.pdf]

## Supporting Information

### Selectively actuated multi-shape memory effect of a polymer multicomposite

Wenbing Li<sup>1</sup>, Yanju Liu<sup>2</sup>, and Jinsong Leng<sup>\*1</sup>

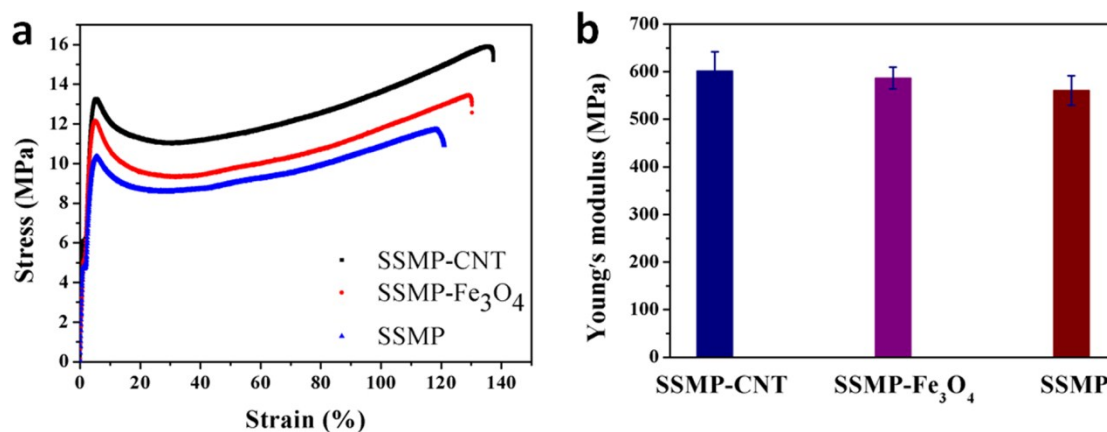

**Figure S1.** (a) Tensile results at room temperature, and (b) Young's modulus values from the tensile test of pure SSMP, SSMP-Fe<sub>3</sub>O<sub>4</sub> and SSMP-CNT composites.

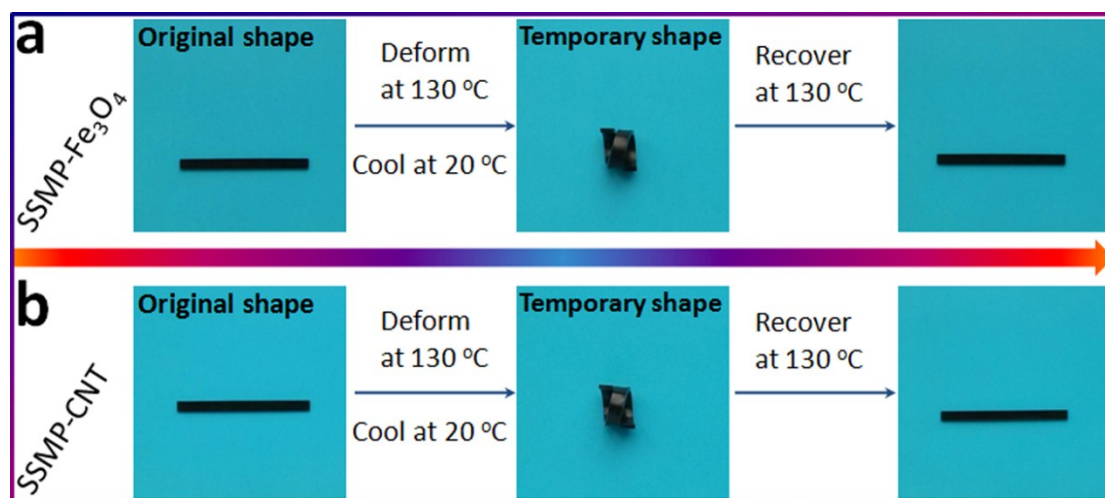

**Figure S2.** Series of photographs showing dual-shape memory recovery process of the SSMP-Fe<sub>3</sub>O<sub>4</sub> (a), and SSMP-CNT composites (b) in 130 °C oven.

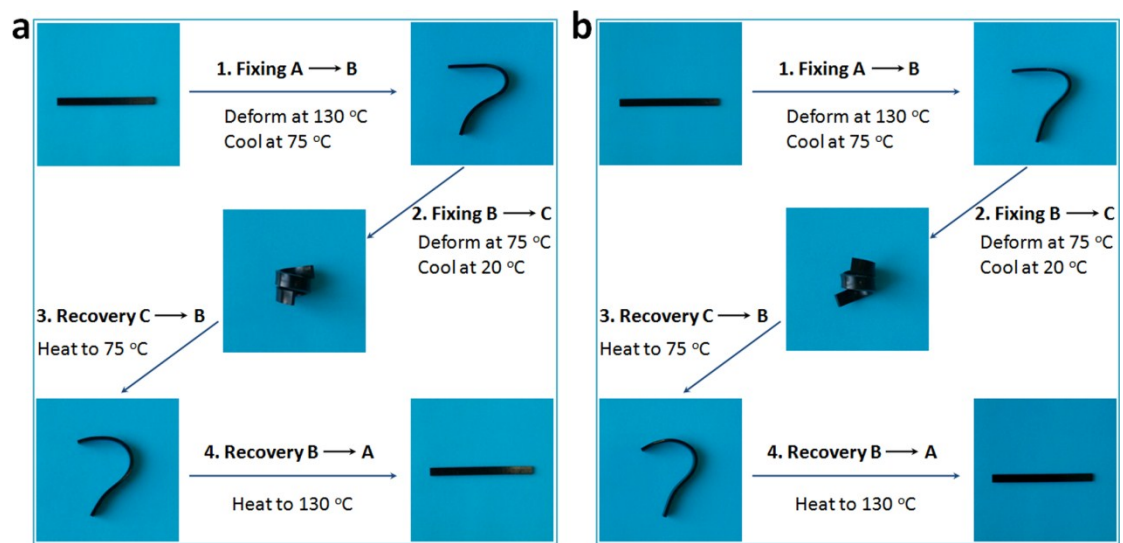

**Figure S3.** (a, b) Illustration of the triple shape memory effect of SSMP-Fe<sub>3</sub>O<sub>4</sub> and SSMP-CNT:

A) original shape, B) first temporary shape, and C) second temporary shape.

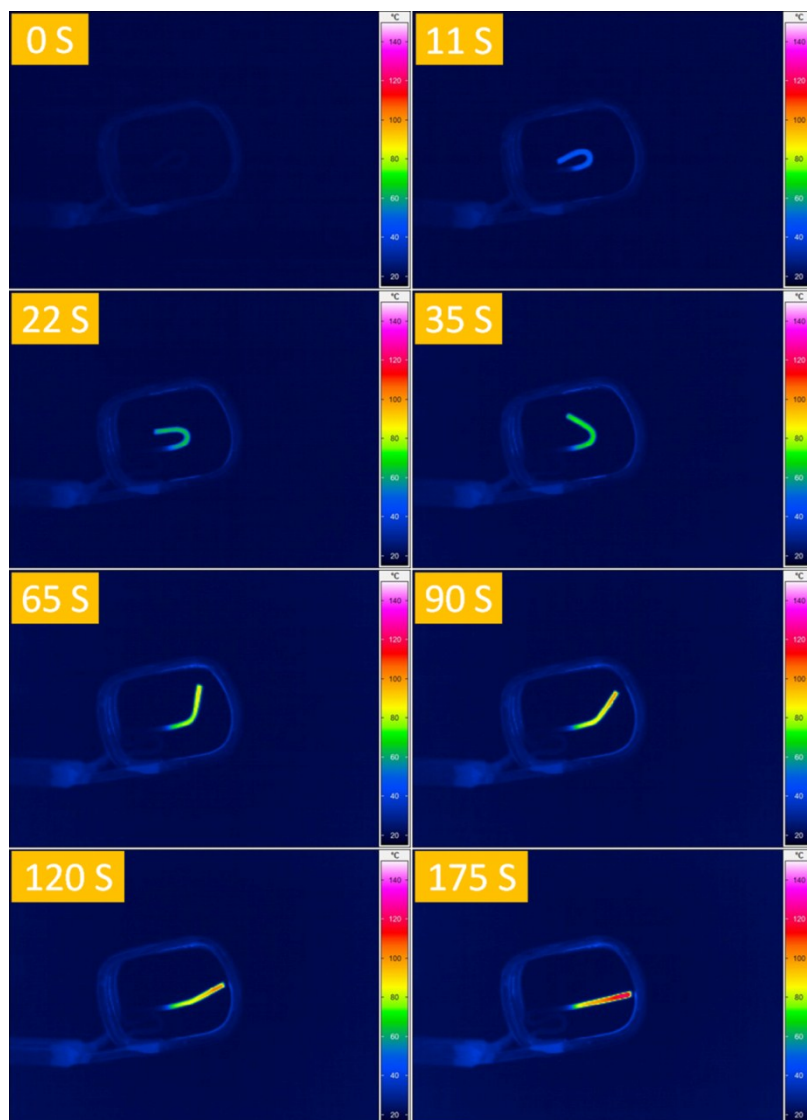

**Figure S4.** Photos of the multicomposite sample during recovery in alternating magnetic field taken with an infrared camera.

**Table S1**

Mechanical properties of neat SSMP, SSMP-Fe<sub>3</sub>O<sub>4</sub> and SSMP-CNT samples.

| Samples                 | SSMP           | SSMP-Fe <sub>3</sub> O <sub>4</sub> | SSMP-CNT       |
|-------------------------|----------------|-------------------------------------|----------------|
| Young's modulus (MPa)   | 560.46 ± 15.96 | 586.67 ± 11.51                      | 601.96 ± 19.79 |
| Tensile strength (MPa)  | 11.72 ± 0.34   | 13.46 ± 0.27                        | 15.92 ± 0.52   |
| Elongation at break (%) | 120.96 ± 3.45  | 130.29 ± 2.61                       | 137.40 ± 4.47  |

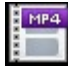

Movie S1.mp4

**Movie S1.** Alternating magnetic field inducing shape memory recovery process.

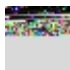

Movie S2.mp4

**Movie S2.** Radiofrequency inducing shape memory recovery process.



Movie S3.mp4

**Movie S3.** Direct heating inducing shape memory recovery process at 130 °C.
